# Supplementary material for: Peptide coated gold nanoparticles that bind lanthanide ions
Source: Royal Society of Chemistry journal article supplement (doi:10.1039/c1cc11477h), 2011-01-01
Supplement: c1cc11477h.pdf [file c1cc11477h.pdf]

## Supplementary Information

# Peptide modified gold nanoparticles that bind lanthanide ions

Alison Savage<sup>a</sup> Zoe Pikramenou,<sup>\*a</sup>

### *Synthetic details.*

#### **Preparation of ThiocticALNN Peptide**

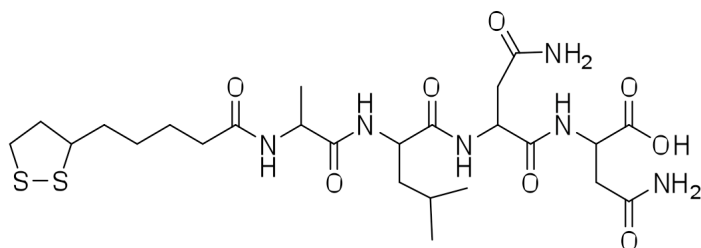

ThiocticALNN was synthesised using a CEM discover SPS microwave reactor. Fmoc-Asn-(Trt)-Wang resin (0.208 g) was swollen in DMF (7 cm<sup>3</sup>) for 15 minutes. The DMF was removed and the resin washed with DMF (5 x 7 cm<sup>3</sup>). The Fmoc protecting group of the amino acid was removed by adding 20% piperidine in DMF (7 cm<sup>3</sup>) and placing in the microwave reactor (Conditions: 20 W, 75 °C, 3 min). The deprotection solution was removed and the resin washed with DMF (5 x 7 cm<sup>3</sup>). Fmoc-L-Asn-(trt)-OH (0.5 mmol) was added to the resin in DMF, along with the activator HBTU and the activator base DIEA and then coupled in the microwave reactor (Conditions: 20 W, 75 °C, 3 min). The resin was then washed with DMF (5 x 7 cm<sup>3</sup>). The deprotection and coupling was repeated for each of the amino acids, Fmoc-L-Leu-OH (0.5 mmol), Fmoc-L-Ala-OH.H<sub>2</sub>O (0.5 mmol) and thioctic acid (1 mmol). After the final coupling of the thioctic acid to the peptide, the resin was washed with DCM (5 x 7 cm<sup>3</sup>). The peptide was cleaved from the resin in the microwave reactor (Conditions: 20 W, 35 °C, 25 minutes) using a cleavage solution of 90% TFA, 2% anisole, 5% thioanisole and 3% EDT. The final solution was filtered, reduced in volume under N<sub>2</sub> and cold diethyl ether (40 cm<sup>3</sup>, -20 °C) was added which caused the formation of a white precipitate. The precipitate was isolated by filtration and washed with diethyl ether, redissolved in water (40 cm<sup>3</sup>) and acetic acid (15 cm<sup>3</sup>) and freeze dried. The crude Peptide was then purified by semi-prep HPLC (C18 column, Acetonitrile/Water/TFA). (5.2 mg, 8.4%) MS (MALDI) m/z 641 [M+Na]<sup>+</sup>, 643 [M+2H+Na]<sup>+</sup>, 657[M+K]<sup>+</sup>, 659 [M+2H+K]<sup>+</sup>. UV-vis (H<sub>2</sub>O) λ<sub>max</sub> 203 nm

ThioKEESLADLL was purchased from United Peptide Corporation, purified by HPLC, MS m/z 1206.

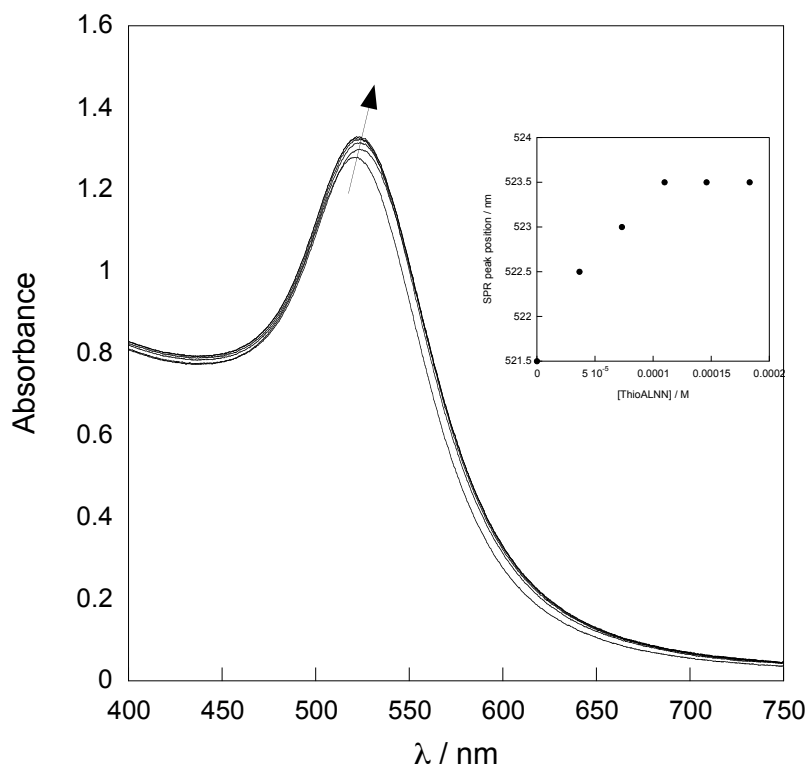

**Figure S1.** UV-vis spectra of gold nanoparticles upon incremental addition (in  $\mu\text{l}$ ) of a 5 mM solution of ThioALNN in phosphate buffer (pH = 7.4, 160 mM NaCl, 3mM KCl, 8 mM  $\text{Na}_2\text{HPO}_4$ , 1 mM  $\text{KH}_2\text{PO}_4$ ). Concentration of gold nanoparticles is 4.5 nM and the final concentration of ThioALNN is 0.183 mM. Inset: Plot of the SPR shift vs. concentration of peptide.

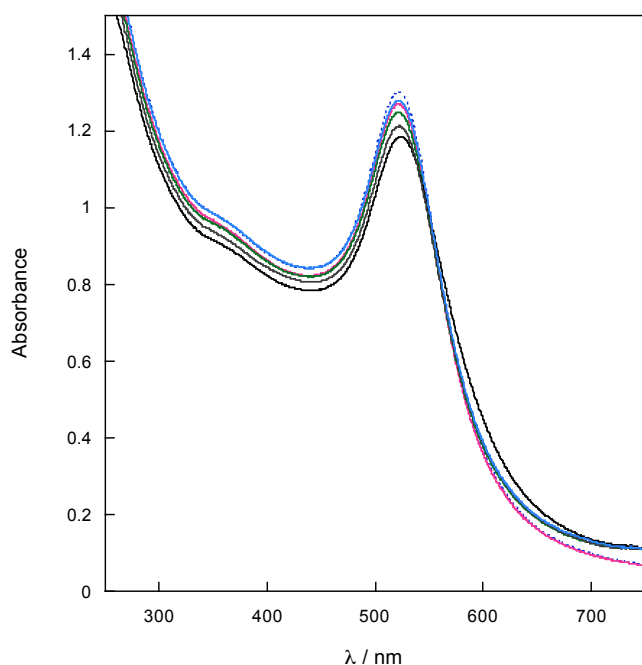

**Figure S2.** UV-vis spectra monitoring the addition of  $\text{Eu}^{3+}$  to Au-ThioALNN. Concentration of gold nanoparticles is 4.5 nM, [ThioALNN] = 0.183 mM. A 10 mM stock solution of  $\text{Eu}^{3+}$  is added in  $\mu\text{l}$  increments.

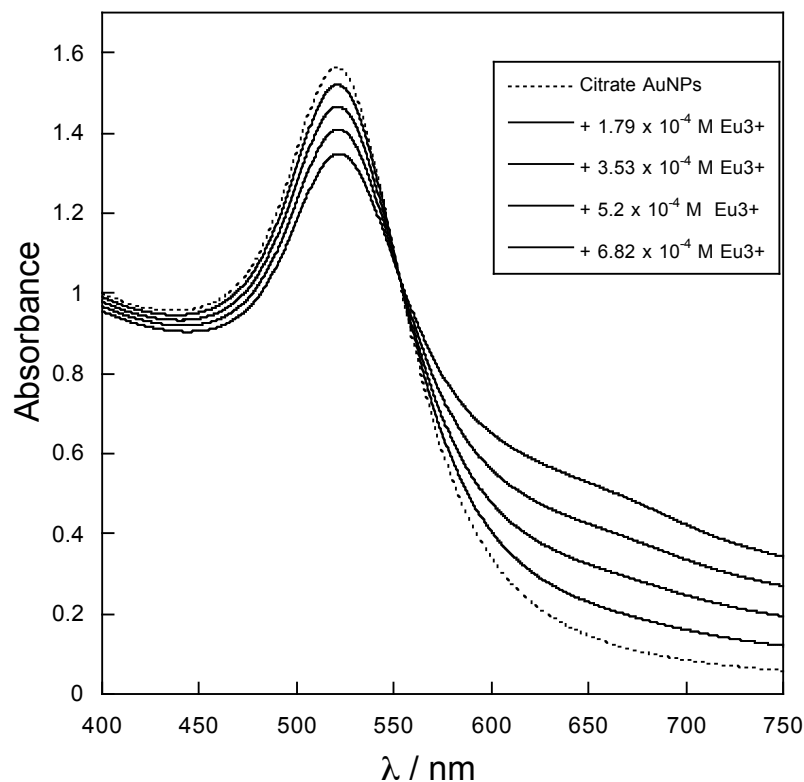

**Figure S3.** UV-vis spectra of titration of Eu<sup>3+</sup> with Au-citrate nanoparticles. Concentration of citrate AuNPs = 4.5 nM. A 10 mM stock solution of Eu<sup>3+</sup> is added in  $\mu$ l increments.

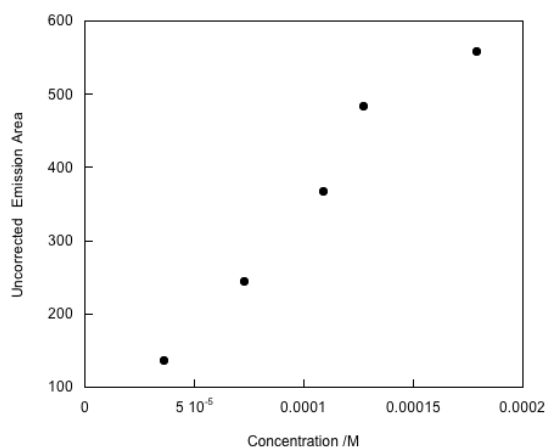

**Figure S4.** Plot of emission increase plot upon addition of Eu<sup>3+</sup> to Au-citrate nanoparticles (4.5 nM), not corrected for residual Eu<sup>3+</sup> emission, due to weak signal.

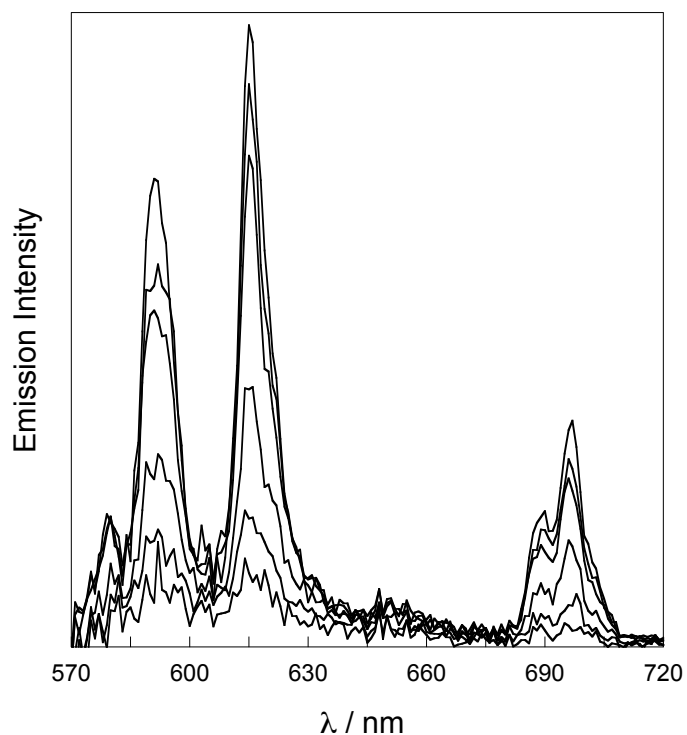

Figure S5. Emission spectra of titration of a solution of  $\text{Eu}^{3+}$  (5 mM) in  $\mu\text{l}$  increments to a solution of ThioALNN 0.18 mM.

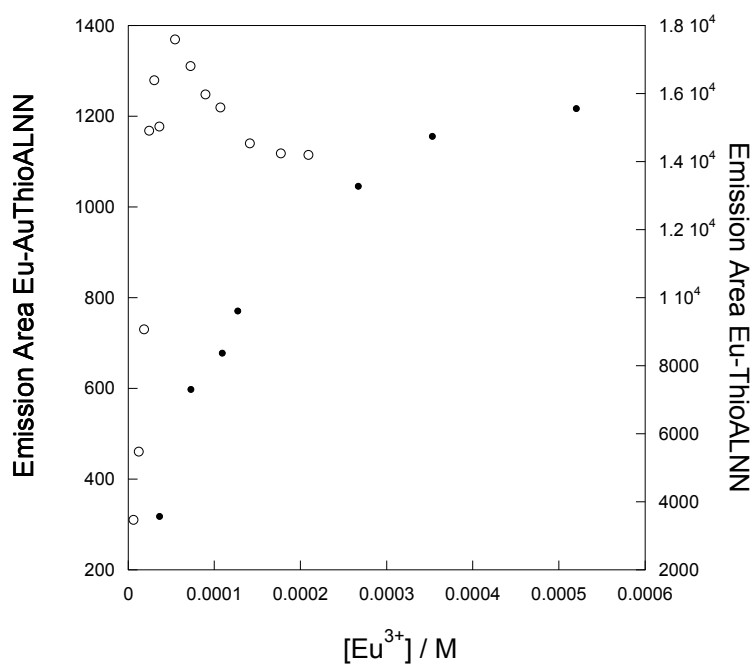

Figure S6. Comparison of relative emission increase upon addition of  $\text{Eu}^{3+}$  solution in Au-ThioALNN (black circles) and ThioALNN (open circles).

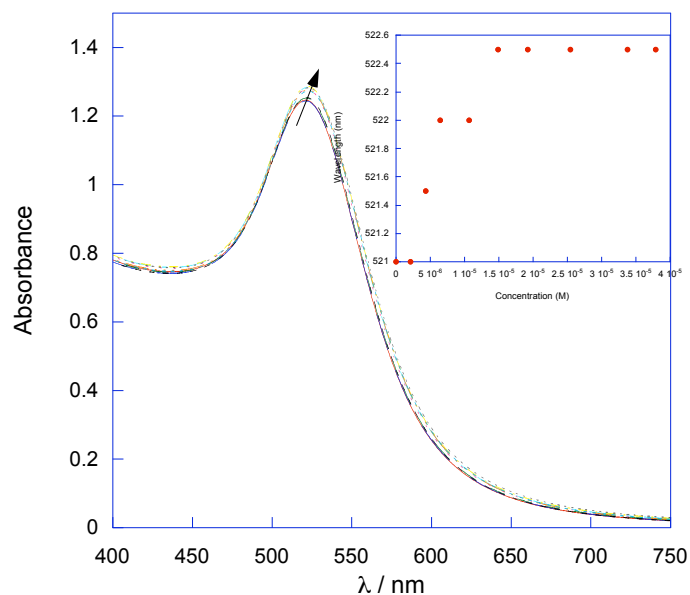

**Figure S7.** UV-vis spectra of gold nanoparticles upon increment addition (in  $\mu\text{l}$ ) of a 5 mM solution of ThioKEESLADLL in phosphate buffer (pH = 7.4, 160 mM NaCl, 3mM KCl, 8 mM  $\text{Na}_2\text{HPO}_4$ , 1 mM  $\text{KH}_2\text{PO}_4$ ). Concentration of gold nanoparticles is 4.5 nM. Inset: Plot of the SPR shift vs. concentration of peptide.

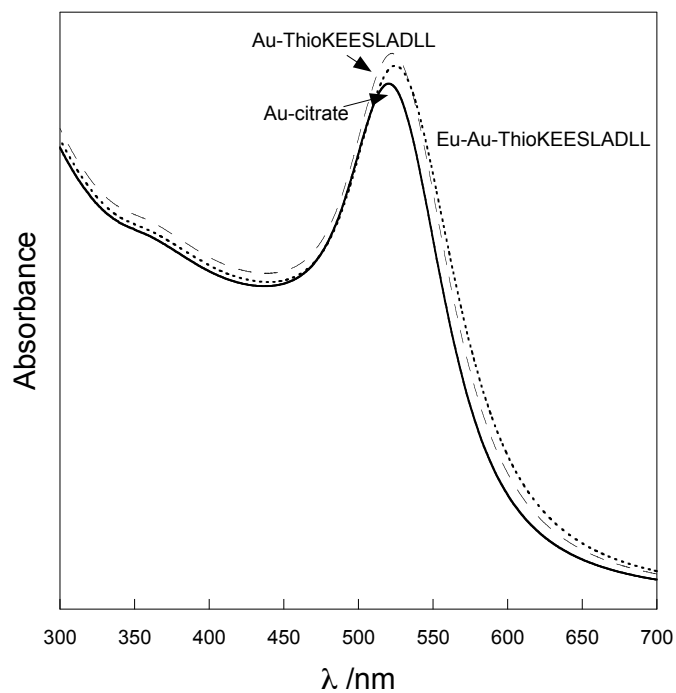

**Figure S8.** Selected UV-vis spectra featuring the SPR band of citrate modified nanoparticles 4.5 nM (—) upon addition of ThioKEESLADLL 0.18 mM in phosphate buffer, (--) and  $\text{Eu}^{3+}$  0.68 mM in water (...).

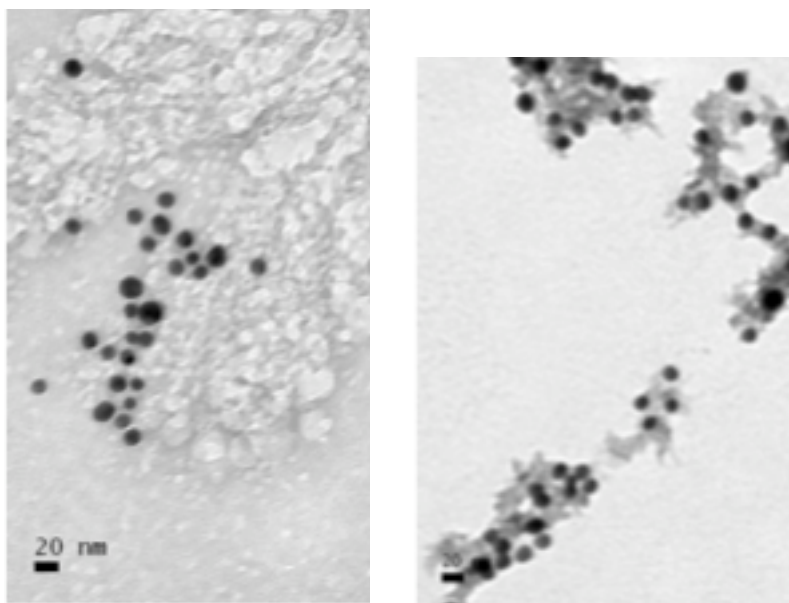

**Figure S9.** TEM images of Au-ThioKEESLADLL (left) and Eu Au-ThioKEESLADLL (right).

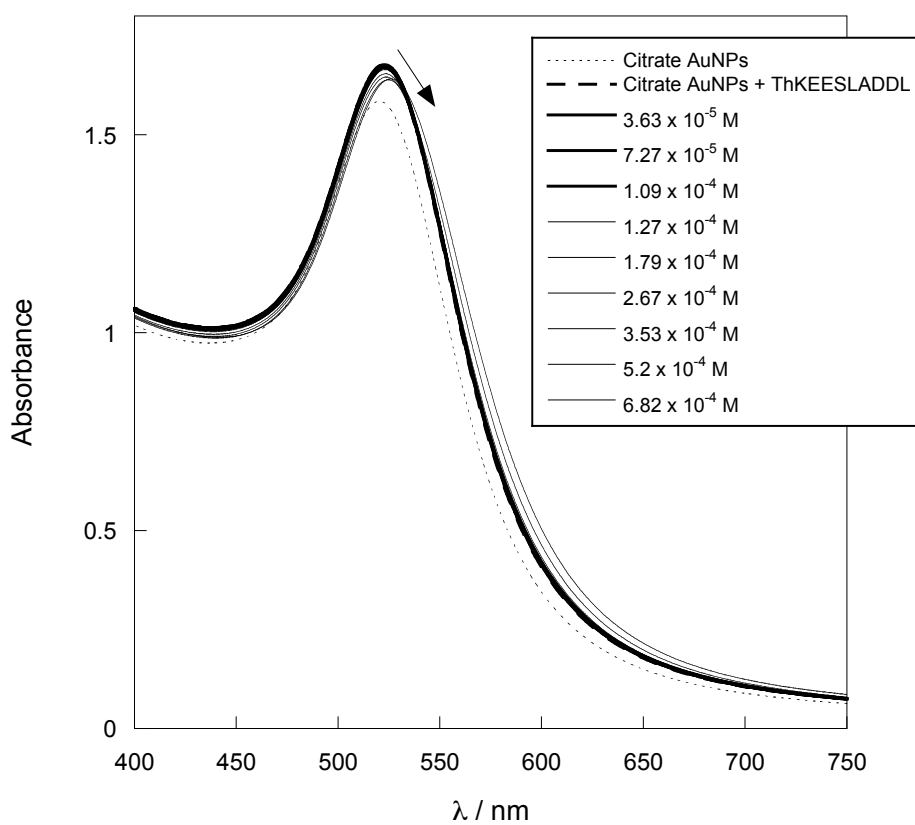

**Figure S10.** UVvis spectra monitoring the addition of  $\text{Eu}^{3+}$  to Au-ThioKEESLADLL, [nanoparticles]= 4.5 nM, [ThioKEESLADLL] 0.18 mM .
